# Supplementary material
Source: PubMed Central journal article supplement (PMC4213550)
Supplement: NIHMS625809-supplement-Supplemental_Material.pdf [file NIHMS625809-supplement-Supplemental_Material.pdf]

## **SUPPLEMENTAL MATERIAL**

**Supplemental Table I** Baseline Demographic and Clinical Characteristics of Subjects by TG/HDL-C Ratio Quintile and TC/HDL-C Ratio Quintile, Respectively

|                                    | Quintile of TG/HDL-C Ratio |            |                        |                         |                          | <i>P</i> | Quintile of TC/HDL-C Ratio |                       |                        |                         |                          | <i>P</i> |
|------------------------------------|----------------------------|------------|------------------------|-------------------------|--------------------------|----------|----------------------------|-----------------------|------------------------|-------------------------|--------------------------|----------|
|                                    | 1 (n=677)                  | 2 (n=678)  | 3 (n=676)              | 4 (n=677)               | 5 (n=677)                |          | 1 (n=689)                  | 2 (n=688)             | 3 (n=689)              | 4 (n=686)               | 5 (n=688)                |          |
| Age, year                          | 68.4±11.1                  | 67.0±10.7  | <sup>a</sup> 66.5±10.3 | 65.2±10.7               | <sup>b</sup> 64.2±10.6   | <0.001   | 68.4±10.5                  | 67.2±10.5             | <sup>a</sup> 66.0±11.2 | 65.5±10.7               | <sup>b</sup> 64.1±10.5   | <0.001   |
| Male sex                           | 368 (54.4)                 | 403 (59.4) | 426 (63.0)             | 418 (61.7)              | 492 (72.7)               | <0.001   | 333 (48.3)                 | 400 (58.1)            | 430 (62.4)             | 477 (69.5)              | 500 (72.7)               | <0.001   |
| Non-white                          | 180 (26.6)                 | 158 (23.3) | 127 (18.8)             | 124 (18.3)              | 104 (15.4)               | <0.001   | 155 (22.5)                 | 131 (19.0)            | 151 (21.9)             | 138 (20.1)              | 125 (18.2)               | 0.217    |
| Body mass index, kg/m <sup>2</sup> | 26.3±5.1                   | 27.9±5.3   | <sup>b</sup> 28.3±5.5  | 29.3±6.6                | <sup>a</sup> 29.7±5.4    | <0.001   | 26.8±5.4                   | <sup>b</sup> 27.9±5.3 | 28.8±6.3               | 28.7±5.4                | <sup>a</sup> 29.4±5.7    | <0.001   |
| Hypertension                       | 545 (80.5)                 | 569 (83.9) | 568 (84.0)             | 587 (86.7)              | 601 (88.8)               | <0.001   | 572 (83.0)                 | 583 (84.7)            | 574 (83.3)             | 594 (86.6)              | 588 (85.5)               | 0.320    |
| Systolic BP, mm Hg                 | 139.8±18.7                 | 141.3±18.6 | 140.8±19.0             | 140.1±18.4              | 140.7±18.4               | 0.590    | 139.7±18.4                 | 141.3±18.9            | 140.5±18.9             | 141.2±18.5              | 140.5±18.6               | 0.514    |
| Diastolic BP, mm Hg                | 77.4±10.1                  | 78.6±10.1  | 77.0±10.0              | 78.1±10.0               | 77.6±10.1                | 0.035    | 77.2±9.8                   | 77.9±10.3             | 77.9±10.1              | 78.0±10.3               | 78.1±10.0                | 0.517    |
| Diabetes mellitus                  | 119 (17.6)                 | 146 (21.5) | 186 (27.5)             | 232 (34.3)              | 312 (46.1)               | <0.001   | 155 (22.5)                 | 174 (25.3)            | 202 (29.3)             | 219 (31.9)              | 261 (37.9)               | <0.001   |
| Lipid                              |                            |            |                        |                         |                          |          |                            |                       |                        |                         |                          |          |
| LDL-C, mg/dL                       | 116.0±36.3                 | 123.6±35.7 | 124.1±38.8             | <sup>a</sup> 126.7±41.3 | <sup>b</sup> 119.0±48.6  | <0.001   | 95.3±29.6                  | 113.9±31.6            | 122.3±33.5             | <sup>b</sup> 131.5±37.4 | <sup>a</sup> 146.8±48.7  | <0.001   |
| TG, mg/dL                          | 81.8±29.0                  | 117.0±26.5 | 148.2±35.2             | <sup>b</sup> 194.8±44.4 | <sup>a</sup> 331.0±277.9 | <0.001   | 108.6±51.5                 | 136.4±64.3            | 162.7±76.5             | <sup>b</sup> 193.4±90.6 | <sup>a</sup> 272.7±288.8 | <0.001   |
| HDL-C, mg/dL                       | 61.7±20.0                  | 49.1±11.0  | 43.5±10.0              | <sup>a</sup> 39.4±8.2   | <sup>b</sup> 33.5±7.5    | <0.001   | —                          | —                     | —                      | —                       | —                        |          |
| Homocysteine, μmol/L               | 13.9±6.4                   | 14.1±6.2   | 13.6±4.0               | 14.1±5.5                | 14.3±5.7                 | 0.169    | 14.1±7.7                   | 13.7±4.6              | 14.0±5.2               | 14.3±5.7                | 14.1±4.7                 | 0.272    |
| Days from stroke to randomization  | 35.7±35.0                  | 36.9±36.1  | 38.1±33.1              | 34.4±33.4               | 36.9±33.9                | 0.355    | 37.8±34.5                  | 37.6±33.5             | 37.2±35.2              | 34.7±33.5               | 34.9±34.6                | 0.259    |
| NIHSS score*                       | 1 (0–2)                    | 1 (0–2)    | 1 (0–3)                | 1 (0–2)                 | 1 (0–3)                  | 0.288    | <sup>b</sup> 1 (0–2)       | 1 (0–2)               | 1 (0–2)                | 1 (0–3)                 | <sup>a</sup> 1 (0–3)     | 0.018    |
| History                            |                            |            |                        |                         |                          |          |                            |                       |                        |                         |                          |          |
| Current Smoking                    | 111 (16.4)                 | 106 (15.6) | 96 (14.2)              | 112 (16.5)              | 143 (21.1)               | 0.011    | 105 (15.3)                 | 112 (16.3)            | 99 (14.4)              | 108 (15.7)              | 155 (22.5)               | <0.001   |
| Prior stroke†                      | 160 (23.6)                 | 150 (22.1) | 145 (21.5)             | 143 (21.1)              | 183 (27.0)               | 0.065    | 151 (21.9)                 | 156 (22.7)            | 176 (25.5)             | 139 (20.3)              | 171 (24.9)               | 0.124    |

|                        |            |            |            |            |            |        |            |            |            |            |            |        |
|------------------------|------------|------------|------------|------------|------------|--------|------------|------------|------------|------------|------------|--------|
| Angina‡                | 47 (6.9)   | 44 (6.5)   | 54 (8.0)   | 52 (7.7)   | 51 (7.6)   | 0.831  | 47 (6.8)   | 54 (7.8)   | 48 (7.0)   | 47 (6.9)   | 59 (8.6)   | 0.657  |
| Any cardiac disease§   | 143 (21.1) | 145 (21.4) | 168 (24.9) | 162 (23.9) | 201 (29.7) | 0.001  | 162 (23.5) | 166 (24.1) | 159 (23.1) | 167 (24.3) | 176 (25.6) | 0.849  |
| Carotid endarterectomy | 41 (6.1)   | 44 (6.5)   | 52 (7.7)   | 47 (6.9)   | 45 (6.6)   | 0.811  | 44 (6.4)   | 46 (6.7)   | 47 (6.8)   | 48 (7.0)   | 48 (7.0)   | 0.992  |
| Medication             |            |            |            |            |            |        |            |            |            |            |            |        |
| Antihypertensive use¶  | 515 (76.1) | 548 (80.8) | 553 (81.8) | 564 (83.3) | 568 (83.9) | 0.002  | 547 (79.4) | 560 (81.4) | 558 (81.0) | 571 (83.2) | 560 (81.4) | 0.494  |
| Lipid modifier use     | 288 (42.5) | 342 (50.4) | 388 (57.4) | 402 (59.4) | 444 (65.6) | <0.001 | 322 (46.7) | 351 (51.0) | 363 (52.7) | 405 (59.0) | 448 (65.1) | <0.001 |
| Antithrombotic use     | 626 (92.5) | 636 (93.8) | 636 (94.1) | 634 (93.6) | 635 (93.8) | 0.775  | 646 (93.8) | 639 (92.9) | 657 (95.4) | 631 (92.0) | 646 (93.9) | 0.124  |
| High-dose B vitamin    | 330 (48.7) | 346 (51.0) | 332 (49.1) | 320 (47.3) | 348 (51.4) | 0.531  | 344 (49.9) | 331 (48.1) | 367 (53.3) | 348 (50.7) | 343 (49.9) | 0.423  |

Values are numbers (percentages) of patients. \* Median (interquartile range).  $a > b P < 0.05$  by Dunnett *post hoc* tests. Ranges for TG/HDL-C ratio quintile were 1<sup>st</sup>;  $\leq 1.93$ , 2<sup>nd</sup>; 1.94–2.86, 3<sup>rd</sup>; 2.87–4.05, 4<sup>th</sup>; 4.06–6.21, and 5<sup>th</sup>;  $\geq 6.22$ . Ranges for TC/HDL-C ratio quintile were 1<sup>st</sup>;  $\leq 3.50$ , 2<sup>nd</sup>; 3.51–4.20, 3<sup>rd</sup>; 4.21–4.98, 4<sup>th</sup>; 4.99–5.97, and 5<sup>th</sup>;  $\geq 5.98$ . † Before VISIP qualifying stroke. ‡ Determined by the Rose questionnaire.<sup>1</sup> § Defined as history of myocardial infarction, congestive heart failure, coronary angioplasty, or coronary artery bypass graft surgery. ¶ Includes angiotensin-converting enzyme inhibitors, angiotensin II receptor blocker, peripheral sympatholytic, central sympatholytic,  $\beta$ -blockers,  $\alpha$ -blockers,  $\alpha$ - and  $\beta$ -blockers, diltiazem or verapamil, other calcium channel blocker, loop active diuretic, thiazide diuretic, and potassium-sparing diuretic. BP indicates blood pressure; NIHSS, qualifying stroke National Institutes of Health Stroke Scale; TG, triglycerides; HDL-C, high-density lipoprotein cholesterol; TC, total cholesterol; LDL-C, low-density lipoprotein cholesterol.

## REFERENCE

1. Rose GA. The diagnosis of ischaemic heart pain and intermittent claudication in field surveys. *Bull World Health Organ.* 1962;27:645–658.

**Supplemental Table II** Baseline Demographic and Clinical Characteristics of Subjects by LDL-C/HDL-C Ratio Quintile and non-HDL-C Quintile, Respectively

|                                    | Quintile of LDL-C/HDL-C Ratio |                       |                        |                          |                          | <i>P</i> | Quintile of non-HDL-C   |                       |            |                        |                         | <i>P</i> |
|------------------------------------|-------------------------------|-----------------------|------------------------|--------------------------|--------------------------|----------|-------------------------|-----------------------|------------|------------------------|-------------------------|----------|
|                                    | 1 (n=686)                     | 2 (n=668)             | 3 (n=677)              | 4 (n=677)                | 5 (n=675)                |          | 1 (n=709)               | 2 (n=682)             | 3 (n=695)  | 4 (n=675)              | 5 (n=679)               |          |
| Age, year                          | 67.7±10.6                     | 67.5±10.3             | <sup>a</sup> 66.0±11.3 | 65.5±11.0                | <sup>b</sup> 64.6±10.4   | <0.001   | 67.7±10.6               | 66.7±10.8             | 66.9±10.7  | <sup>a</sup> 65.9±10.7 | <sup>b</sup> 64.0±10.8  | <0.001   |
| Male sex                           | 336 (49.0)                    | 391 (58.5)            | 423 (62.5)             | 484 (71.5)               | 471 (69.8)               | <0.001   | 460 (64.9)              | 447 (65.5)            | 441 (63.5) | 410 (60.7)             | 382 (56.3)              | 0.002    |
| Non-white                          | 154 (22.4)                    | 125 (18.7)            | 144 (21.3)             | 127 (18.8)               | 142 (21.0)               | 0.338    | 167 (23.6)              | 125 (18.3)            | 133 (19.1) | 131 (19.4)             | 144 (21.2)              | 0.111    |
| Body mass index, kg/m <sup>2</sup> | 27.2±5.7                      | <sup>b</sup> 27.9±5.3 | 29.0±6.4               | 28.6±5.0                 | <sup>a</sup> 28.8±5.8    | <0.001   | <sup>b</sup> 27.5±5.3   | <sup>a</sup> 28.3±5.8 | 28.3±5.7   | 28.5±5.8               | <sup>a</sup> 29.0±5.6   | <0.001   |
| Hypertension                       | 577 (84.1)                    | 564 (84.4)            | 580 (85.7)             | 582 (86.0)               | 566 (83.9)               | 0.752    | 606 (85.4)              | 594 (87.1)            | 587 (84.5) | 555 (82.2)             | 569 (83.8)              | 0.138    |
| Systolic BP, mm Hg                 | 139.0±18.0                    | 141.1±19.0            | 141.0±18.7             | 140.5±18.5               | 141.1±18.9               | 0.175    | <sup>b</sup> 138.7±18.4 | 140.8±18.8            | 140.6±19.5 | 141.2±17.8             | <sup>a</sup> 141.9±18.6 | 0.021    |
| Diastolic BP, mm Hg                | 76.7±9.9                      | 77.6±10.0             | <sup>a</sup> 78.0±10.3 | 77.9±10.1                | <sup>b</sup> 78.5±10.0   | 0.013    | <sup>b</sup> 76.8±9.9   | 77.7±10.1             | 78.1±10.4  | 78.0±10.1              | <sup>a</sup> 78.6±9.9   | 0.012    |
| Diabetes mellitus                  | 189 (27.6)                    | 194 (29.0)            | 189 (27.9)             | 211 (31.2)               | 210 (31.1)               | 0.425    | 222 (31.3)              | 202 (29.6)            | 185 (26.6) | 186 (27.6)             | 216 (31.8)              | 0.143    |
| Lipid                              |                               |                       |                        |                          |                          |          |                         |                       |            |                        |                         |          |
| TG, mg/dL                          | 151.2±128.9                   | 155.2±101.8           | 169.2±91.2             | <sup>b</sup> 186.5±107.7 | <sup>a</sup> 201.5±101.9 | <0.001   | —                       | —                     | —          | —                      | —                       |          |
| HDL-C, mg/dL                       | —                             | —                     | —                      | —                        | —                        |          | <sup>a</sup> 48.8±21.5  | 45.0±14.1             | 45.0±13.2  | 44.3±13.3              | <sup>b</sup> 44.0±12.8  | <0.001   |
| Homocysteine, μmol/L               | 14.1±7.5                      | 13.9±6.6              | 14.0±4.5               | 14.1±4.4                 | 14.0±4.4                 | 0.932    | 14.1±5.1                | 14.2±5.7              | 14.0±5.6   | 14.1±7.1               | 13.8±4.8                | 0.796    |
| Days from stroke to randomization  | 38.9±33.8                     | 37.1±34.0             | 36.8±35.0              | 35.6±33.5                | 33.8±35.2                | 0.088    | 36.1±34.2               | 38.4±34.1             | 37.1±36.0  | 34.3±32.9              | 36.1±34.1               | 0.263    |
| NIHSS score*                       | 1 (0–2)                       | 1 (0–2)               | <sup>b</sup> 1 (0–2)   | 1 (0–3)                  | <sup>a</sup> 1 (0–3)     | 0.005    | 1 (0–2)                 | 1 (0–2)               | 1 (0–3)    | 1 (0–2)                | 1 (0–3)                 | 0.239    |
| History                            |                               |                       |                        |                          |                          |          |                         |                       |            |                        |                         |          |
| Current Smoking                    | 118 (17.2)                    | 92 (13.8)             | 104 (15.4)             | 105 (15.5)               | 147 (21.8)               | 0.001    | 116 (16.4)              | 109 (16.0)            | 101 (14.5) | 106 (15.7)             | 147 (21.6)              | 0.005    |
| Prior stroke†                      | 160 (23.3)                    | 167 (25.0)            | 162 (23.9)             | 151 (22.3)               | 140 (20.7)               | 0.399    | 167 (23.6)              | 162 (23.8)            | 164 (23.6) | 165 (24.4)             | 135 (19.9)              | 0.287    |

|                        |            |            |            |            |            |        |            |            |            |            |            |        |
|------------------------|------------|------------|------------|------------|------------|--------|------------|------------|------------|------------|------------|--------|
| Angina‡                | 47 (6.9)   | 51 (7.6)   | 48 (7.1)   | 49 (7.3)   | 53 (7.9)   | 0.957  | 59 (8.3)   | 47 (6.9)   | 50 (7.2)   | 43 (6.4)   | 56 (8.3)   | 0.568  |
| Any cardiac disease§   | 176 (25.7) | 164 (24.6) | 148 (21.9) | 162 (23.9) | 170 (25.2) | 0.519  | 237 (33.4) | 166 (24.3) | 156 (22.4) | 133 (19.7) | 138 (20.3) | <0.001 |
| Carotid endarterectomy | 45 (6.6)   | 44 (6.6)   | 44 (6.5)   | 42 (6.2)   | 54 (8.0)   | 0.714  | 51 (7.2)   | 44 (6.5)   | 48 (6.9)   | 43 (6.4)   | 47 (6.9)   | 0.971  |
| Medication             |            |            |            |            |            |        |            |            |            |            |            |        |
| Antihypertensive use¶  | 552 (80.5) | 539 (80.7) | 557 (82.3) | 564 (83.3) | 535 (79.3) | 0.342  | 590 (83.2) | 572 (83.9) | 560 (80.6) | 535 (79.3) | 539 (79.4) | 0.078  |
| Lipid modifier use     | 345 (50.3) | 343 (51.3) | 346 (51.1) | 385 (56.9) | 441 (65.3) | <0.001 | 356 (50.2) | 338 (49.6) | 351 (50.5) | 397 (58.8) | 447 (65.8) | <0.001 |
| Antithrombotic use     | 641 (93.4) | 620 (92.8) | 637 (94.1) | 632 (93.4) | 634 (93.9) | 0.888  | 663 (93.5) | 638 (93.5) | 658 (94.7) | 633 (93.8) | 627 (92.3) | 0.530  |
| High-dose B vitamin    | 346 (50.4) | 338 (50.6) | 331 (48.9) | 325 (48.0) | 336 (49.8) | 0.864  | 360 (50.8) | 353 (51.8) | 337 (48.5) | 329 (48.7) | 328 (48.3) | 0.616  |

Values are numbers (percentages) of patients. \* Median (interquartile range).  $a > b$   $P < 0.05$  by Dunnett *post hoc* tests. Ranges for LDL-C/HDL-C ratio quintile were 1<sup>st</sup>;  $\leq 1.92$ , 2<sup>nd</sup>; 1.93–2.48, 3<sup>rd</sup>; 2.49–3.04, 4<sup>th</sup>; 3.05–3.80, and 5<sup>th</sup>;  $\geq 3.81$ . Ranges for non-HDL-C quintile were 1<sup>st</sup>;  $\leq 120$ , 2<sup>nd</sup>; 121–143, 3<sup>rd</sup>; 144–164, 4<sup>th</sup>; 165–190, and 5<sup>th</sup>;  $\geq 191$ . † Before VISP qualifying stroke. ‡ Determined by the Rose questionnaire.<sup>1</sup> § Defined as history of myocardial infarction, congestive heart failure, coronary angioplasty, or coronary artery bypass graft surgery. ¶ Includes angiotensin-converting enzyme inhibitors, angiotensin II receptor blocker, peripheral sympatholytic, central sympatholytic,  $\beta$ -blockers,  $\alpha$ -blockers,  $\alpha$ - and  $\beta$ -blockers, diltiazem or verapamil, other calcium channel blocker, loop active diuretic, thiazide diuretic, and potassium-sparing diuretic. BP indicates blood pressure; NIHSS, qualifying stroke National Institutes of Health Stroke Scale; LDL-C, low-density lipoprotein cholesterol; HDL-C, high-density lipoprotein cholesterol; TG, triglycerides.

## REFERENCE

1. Rose GA. The diagnosis of ischaemic heart pain and intermittent claudication in field surveys. *Bull World Health Organ.* 1962;27:645–658.

**Supplemental Table III.** Adjusted Hazard Ratios (AHRs) of Covariates Included in the Adjusted Risk Models of Vascular Outcomes by TG/HDL-C Ratio Quintile and TC/HDL-C Ratio Quintile

|                                   | Outcome                   | AHR (95% CI)          | <i>P</i> | AHR (95% CI)          | <i>P</i> |
|-----------------------------------|---------------------------|-----------------------|----------|-----------------------|----------|
|                                   |                           | <b>TG/HDL-C Ratio</b> |          | <b>TC/HDL-C Ratio</b> |          |
| Age (1-yr difference)             | Stroke                    | 1.01 (1.00–1.03)      | 0.030    |                       |          |
|                                   | Stroke/CHD/vascular death | 1.02 (1.01–1.03)      | <0.001   | 1.03 (1.02–1.04)      | <0.001   |
| Male                              | Stroke                    | —                     | 0.538    |                       |          |
|                                   | Stroke/CHD/vascular death | 1.21 (1.01–1.45)      | 0.042    | 1.21 (1.00–1.45)      | 0.047    |
| Hypertension                      | Stroke                    | —                     | 0.074    |                       |          |
|                                   | Stroke/CHD/vascular death | 2.15 (1.43–3.22)      | <0.001   |                       |          |
| Diabetes mellitus                 | Stroke                    | 1.31 (1.00–1.70)      | 0.049    |                       |          |
|                                   | Stroke/CHD/vascular death | 1.49 (1.24–1.80)      | <0.001   | 1.67 (1.39–2.00)      | <0.001   |
| Smoking                           | Stroke                    | —                     | 0.189    |                       |          |
|                                   | Stroke/CHD/vascular death | 1.32 (1.05–1.66)      | 0.020    | 1.31 (1.04–1.64)      | 0.023    |
| Prior stroke history*             | Stroke                    | 1.92 (1.50–2.47)      | <0.001   |                       |          |
|                                   | Stroke/CHD/vascular death | 1.61 (1.35–1.93)      | <0.001   |                       |          |
| Any cardiac disease†              | Stroke                    | —                     | 0.876    |                       |          |
|                                   | Stroke/CHD/vascular death | 1.44 (1.20–1.73)      | <0.001   |                       |          |
| Antihypertensive use‡             | Stroke                    | —                     | 0.448    |                       |          |
|                                   | Stroke/CHD/vascular death | 0.68 (0.49–0.94)      | 0.020    |                       |          |
| Lipid modifier use                | Stroke                    | 0.74 (0.58–0.94)      | 0.015    |                       |          |
|                                   | Stroke/CHD/vascular death | 0.83 (0.70–0.99)      | 0.035    | —                     | 0.103    |
| NIHSS score                       | Stroke/CHD/vascular death |                       |          | 1.06 (1.02–1.10)      | 0.002    |
| TG                                | Stroke/CHD/vascular death |                       |          | —                     | 0.664    |
| LDL                               | Stroke                    | —                     | 0.877    |                       |          |
|                                   | Stroke/CHD/vascular death | —                     | 0.146    | —                     | 0.651    |
| Non-white                         | Stroke                    | —                     | 0.121    |                       |          |
|                                   | Stroke/CHD/vascular death | —                     | 0.471    |                       |          |
| Body mass index                   | Stroke                    | —                     | 0.579    |                       |          |
|                                   | Stroke/CHD/vascular death | —                     | 0.816    | —                     | 0.838    |
| Days from stroke to randomization | Stroke/CHD/vascular death |                       |          | —                     | 0.201    |

\* Before VISP qualifying stroke. † Defined as history of myocardial infarction, congestive heart failure, coronary angioplasty, or coronary artery bypass graft surgery. ‡ Includes angiotensin-converting enzyme inhibitors, angiotensin II receptor blocker, peripheral sympatholytic, central sympatholytic,  $\beta$ -blockers,  $\alpha$ -blockers,  $\alpha$ - and  $\beta$ -blockers, diltiazem or verapamil, other calcium channel blocker, loop active diuretic, thiazide diuretic, and potassium-sparing diuretic. CHD, coronary heart disease; NIHSS, National Institutes of Health Stroke Scale; TG indicates triglycerides; HDL-C, high-density lipoprotein cholesterol; TC, total cholesterol; LDL-C, low-density lipoprotein cholesterol.
